tile anesthetics thus is required to provide a degree of exposure of the liver analogous to that accomplished after a single injection of phenobarbital.

KENNETH C. LEIBMAN, Ph.D.  
*Department of Pharmacology and  
Therapeutics  
University of Florida College of  
Medicine  
Gainesville, Florida*

# REFERENCES

1. Greene, N. M.: The metabolism of drugs employed in anesthesia, part II, *ANESTHESIOLOGY* 29: 327, 1968.
2. Leibman, K. C.: Metabolism of trichloroethylene in liver microsomes. I. Characteristics of the reaction, *Molec. Pharmacol.* 1: 239, 1965.
3. Byington, K. H., and Leibman, K. C.: Metabolism of trichloroethylene in liver microsomes. II. Identification of the reaction product as chloral hydrate, *Molec. Pharmacol.* 1: 247, 1965.
4. Butler, T. C.: Metabolic transformations of trichloroethylene, *J. Pharmacol. Exp. Ther.* 97: 84, 1949.
5. Boyland, E.: Biological significance of metabolism of polycyclic compounds, *Biochem. Soc. Symp.* 5: 40, 1950.
6. Holtzman, J. L., Gillette, J. R., and Milne, G. W. A.: The incorporation of  $^{14}O$  into naphthalene in the enzymatic formation of 1,2-dihydronaphthalene-1,2-diol, *J. Biol. Chem.* 242: 4386, 1967.
7. Booth, J., Boyland, E., Sato, T., and Sims, P.: Metabolism of polycyclic compounds. 17. The reaction of 1:2-dihydronaphthalene and 1:2-epoxy-1:2:3:4-tetrahydronaphthalene with glutathione catalyzed by tissue preparations, *Biochem. J.* 77: 182, 1960.
8. Leibman, K. C., and Ortiz, E.: Oxidation of indene in liver microsomes, *Molec. Pharmacol.* In press, 1968.
9. Leibman, K. C., and Ortiz, E.: Microsomal hydration of epoxides, *Fed. Proc.* 27: 302, 1968.
10. Wong, D. T., and Terriere, L. C.: Epoxidation of aldrin, isodrin, and heptachlor by rat liver microsomes, *Biochem. Pharmacol.* 14: 375, 1965.
11. Nagatsugawa, T., Ishida, M., and Dahm, P. A.: Microsomal epoxidation of cyclodien insecticides, *Biochem. Pharmacol.* 14: 1853, 1965.
12. Hanriot, M.: Sur l'éther bichloré symétrique, *Ann. chim. phys.* [5] 25: 219, 1982.
13. Litterscheid, F. M.: Untersuchungen über Chlor- und Bromethylalkohol, *Liebigs Ann.* 316: 157, 1901.
14. Stepanow, A., Preobraschensky, N., and Schtschukina, M.: Über die Bromierungs-

produkte des Paraldehyds, *Ber. deut. chem. Ges.* 59: 2533, 1926.

15. Friedman, P. J., and Cooper, J. R.: The role of alcohol dehydrogenase in the metabolism of chloral hydrate, *J. Pharmacol. Exp. Ther.* 129: 373, 1960.
16. Van Dyke, R. A.: Metabolism of volatile anesthetics. III. Induction of microsomal dechlorinating and ether-cleaving enzymes, *J. Pharmacol. Exp. Ther.* 154: 364, 1966.
17. Leibman, K. C., and McAllister, W. J., Jr.: Metabolism of trichloroethylene in liver microsomes. III. Induction of the enzymic activity and its effect on excretion of metabolites, *J. Pharmacol. Exp. Ther.* 157: 574, 1967.

*To the Editor:*—Some statements by Liebman concerning the review article demand comment. In the first place, it is indeed lamentable that Liebman's work was not included in the review. He has, however, plenty of company, rather eminent company at that, and so should not be perturbed. Some things had to be left out; otherwise the review would have resembled a telephone directory.

Second, Liebman criticizes the hypothesis of Daniel (*Biochem. Pharmacol.* 12: 795, 1963) that an ethylene linkage may be formed transiently as an intermediate during trichloroethylene metabolism. Liebman criticizes this hypothesis because the ethylene compound has not been isolated. In its place he proposes the hypothesis that either an epoxide or glycol (or both) might be intermediate products prior to formation of the first stable product he could isolate. Since neither the epoxide nor glycol has been isolated either, Liebman's theory is an attractive hypothesis, as attractive as Daniel's; however, it is merely that, for it has never been demonstrated.

The next point Liebman makes is absolutely correct. The review should have emphasized that intramolecular translocation of chlorine atoms occurs during trichloroethylene but not during chloral hydrate metabolism.

Liebman's final comment is obscure in its relevancy to the subject under discussion: the ability of methoxyflurane to produce enzyme induction. Of course duration of exposure may be of importance. So? It is not at all surprising that Liebman's work on trichloroethylene induction was not quoted. It appeared eight months after the review had been finished.

NICHOLAS M. GREENE, M.D.
